# Supplementary material
Source: HighWire-hosted journal article supplement (https://bmjopen.bmj.com/content/9/4/e024840)
Supplement: inline-supplementary-material-1 [file inline-supplementary-material-1.pdf]

**SupplementaryTable1. Baseline data from sentinel surveillance sites included in the impact assessment project**

| <b>Sl. no.</b> | <b>Name of surveillance site</b>                                                         | <b>No. of under- five AGE admissions a year#</b> |
|----------------|------------------------------------------------------------------------------------------|--------------------------------------------------|
| 1              | Kurnool Medical College, Kurnool, Andhra Pradesh                                         | 410                                              |
| 2              | Government General hospital, Kakinada, Andhra Pradesh                                    | 400                                              |
| 3              | King George Hospital, Vishakhapatnam, Andhra Pradesh                                     | 300                                              |
| 4              | Sri Venkateswara Medical College, Tirupati, AP                                           | 400                                              |
| 5              | Sardar Vallabhai Patel Post Graduate Institute of Pediatrics, Cuttack, Odisha            | 720                                              |
| 6              | Kalinga Institute of Medical Sciences, Bhubaneswar, Odisha                               | 340                                              |
| 7              | Institute of Medical Sciences and SUM Hospital, Bhubaneswar, Odisha                      | 335                                              |
| 8              | Hi-Tech Hospital, Bhubaneswar, Odisha                                                    | 490                                              |
| 9              | Pandit Bhagwat Dayal Sharma Post Graduate Institute of Medical Sciences, Rohtak, Haryana | 250                                              |
| 10             | Shaheed Hasan Khan Mewati Government Medical College, Mewat, Haryana                     | 620                                              |
| 11             | BPS Government Medical College for Women, Sonipat, Haryana                               | 320                                              |
| 12             | Indira Gandhi Government Medical College, Shimla, HP                                     | 200                                              |
| 13             | Rajendra Prasad Government Medical College, Tanda, HP                                    | 300                                              |
| 14             | Post Graduate Institute of Medical Education and Research, Chandigarh                    | 600                                              |

|    |                                                                                  |      |
|----|----------------------------------------------------------------------------------|------|
| 15 | The Institute of Child Health and Hospital for Children, Chennai, Tamil Nadu     | 488  |
| 16 | Kanchi Kama Koti Child Trust Hospital, Chennai, Tamil Nadu                       | 528  |
| 17 | Government Medical College, Madurai, Tamil Nadu                                  | 110  |
| 18 | Christian Medical College, Vellore, Tamil Nadu                                   |      |
| 19 | Nalam Hospital, Vellore, Tamil Nadu                                              |      |
| 20 | Narayani Hospital and Research Centre, Vellore, Tamil Nadu                       |      |
| 21 | GVMC, Adukkumparai, Tamil Nadu                                                   |      |
| 22 | Sawai Man Singh Medical College, Jaipur, Rajasthan                               | 1763 |
| 23 | Dr. Sampurnanand Medical College, Jodhpur, Rajasthan                             | 1627 |
| 24 | Rabindranath Tagore Medical college, Udaipur, Rajasthan                          | 1660 |
| 25 | King George Medical College, Lucknow, Uttar Pradesh                              | 244  |
| 26 | Institute of Medical Sciences, Banaras Hindu University, Varanasi, Uttar Pradesh | 144  |
| 27 | BRD Medical College, Gorakhpur, Uttar Pradesh                                    | 600  |
| 28 | Mangala Hospital and Research Centre, Bijnor, Uttar Pradesh                      | 550  |
| 29 | NSCB Medical College, Jabalpur, Madhya Pradesh                                   | 700  |
| 30 | Mahatma Gandhi Memorial Medical college, Indore, Madhya Pradesh                  | 710  |
| 31 | Government Medical college, Guwahati, Assam                                      | 560  |
| 32 | Baptist Christian Hospital, Tezpur, Assam                                        | 232  |

#Retrospective data for the year 2015
