# Supplementary material
Source: HighWire-hosted journal article supplement (https://bmjopen.bmj.com/content/9/4/e024840)
Supplement: inline-supplementary-material-2 [file inline-supplementary-material-2.pdf]

Supplementary Table 2: Ethical committee details for Protocol submission

| Sl. No. | Name of the institution                                                                  | Name of the ethical committee (Reference number)                                                                                            |
|---------|------------------------------------------------------------------------------------------|---------------------------------------------------------------------------------------------------------------------------------------------|
| 1       | Kurnool Medical College, Kurnool, Andhra Pradesh                                         | Institutional Ethical committee of Kurnool Medical College, Kurnool dated 12.11.2015                                                        |
| 2       | Government General Hospital, Kakinada, Andhra Pradesh                                    | Institutional Ethics Committee cell of Rangaraya Medical College (IEC/RMC/2017/241 dated 06.05.2017)                                        |
| 3       | Andhra Medical College, Vishakhapatnam, Andhra Pradesh                                   | Institutional Ethical committee of King George Hospital, Vishakhapatnam (proposal 1 dated 19.11.2016)                                       |
| 4       | Sri Venkateswara Medical College, Tirupati, Andhra Pradesh                               | Institutional Ethical committee of S.V Medical College (Lr. No. 2/2016 dated 07.02.2016)                                                    |
| 5       | Sardar Vallabhai Patel Post Graduate Institute of Pediatrics, Cuttack, Odisha            | Institutional Ethical committee of SCB Medical College, Cuttack (IEC no. 273 dated 4.4.2016)                                                |
| 6       | Kalinga Institute of Medical Sciences, Bhubaneswar, Odisha                               | Ethics committee of Kalinga Institute of Medical Sciences, Bhubaneswar (KIMS/Dir/11/16 dated 6.01.2016)                                     |
| 7       | Institute of Medical Sciences and SUM Hospital, Bhubaneswar, Odisha                      | Institutional Ethical Committee of Institute of Medical Sciences and SUM Hospital, Bhubaneswar (Letter no. 232/20/11/2015 dated 20.11.2015) |
| 8       | Hi-Tech Hospital and Medical college, Bhubaneswar, Odisha                                | Institutional Ethical Committee of Hi-Tech Medical College and Hospital (HMCH/IEC/15/3067 dated 29.12.2015)                                 |
| 9       | Pandit Bhagwat Dayal Sharma Post Graduate Institute of Medical Sciences, Rohtak, Haryana | Institutional Ethics Committee, Pandit Bhagwat Dayal Sharma Post Graduate Institute of                                                      |

|    |                                                                          |                                                                                                                                                        |
|----|--------------------------------------------------------------------------|--------------------------------------------------------------------------------------------------------------------------------------------------------|
|    |                                                                          | Medical Sciences, Rohtak<br>(No.IEC/16/41 dated<br>28.03.2016)                                                                                         |
| 10 | Shaheed Hasan Khan Mewati Government Medical<br>College, Mewat, Haryana  | Institutional Ethics Committee,<br>Shaheed Hasan Khan Mewati<br>Government Medical College,<br>Mewat (SHKM/CM/2016/890<br>dated 13.02.2016)            |
| 11 | BPS Government Medical College for Women, Sonipat,<br>Haryana            | Institutional Ethics Committee,<br>BPS Government Medical<br>College for Women, Sonipat<br>(No. Peds/BPSGMC/16 dated<br>01.04.2016)                    |
| 12 | Post Graduate Institute of Medical Education and<br>Research, Chandigarh | Institutional Ethics Committee,<br>Post Graduate Institute of<br>Medical Education and Research,<br>Chandigarh (PGI/IEC/2016/3267<br>dated 03.08.2016) |
| 13 | Rajendra Prasad Government Medical College, Tanda,<br>Himachal Pradesh   | Institutional Ethics Committee,<br>Rajendra Prasad Government<br>Medical College, Tanda (HFW-<br>H-DRPGMC/Ethics/2016 dated<br>21.01.2016)             |
| 14 | Indira Gandhi Government Medical College, Shimla,<br>Himachal Pradesh    | Institutional Ethics Committee,<br>Indira Gandhi Government<br>Medical College, Shimla<br>(ECR/533/Inst/HP/2014 dated<br>13.05.2016)                   |
| 15 | Kanchi Kama Koti Child Trust hospital, Chennai, Tamil<br>Nadu            | Ethics committee of Kanchi<br>Kama Koti Childs Trust Hospital<br>and the Childs Trust<br>(CTMRF/EC/S/02/2017 dated<br>18.03.2017)                      |
| 16 | Institute of Child health, Egmore, Tamil Nadu                            | Institutional Ethics Committee of<br>Madras Medical College,<br>Chennai (No. 01052017 dated<br>02.05.2017)                                             |

|    |                                                                 |                                                                                                                         |
|----|-----------------------------------------------------------------|-------------------------------------------------------------------------------------------------------------------------|
| 17 | Government Medical College, Madurai, Tamil Nadu                 | Ethics Committee of Madurai Medical College, Madurai (dated 27.11.2017)                                                 |
| 18 | Christian Medical College, Vellore, Tamil Nadu                  | Institutional Review Board, Christian Medical College, Vellore (IRB Min. no. 9530 dated 22.07.2015)                     |
| 19 | Government Vellore Medical College, Vellore, Tamil Nadu         | Institutional Review Board, Christian Medical College, Vellore (IRB Min. no. 9530 dated 22.07.2015)                     |
| 20 | Nalam Hospital, Vellore, Tamil Nadu                             | Institutional Review Board, Christian Medical College, Vellore (IRB Min. no. 9530 dated 22.07.2015)                     |
| 21 | Narayani Hospital and Research Centre, Vellore, Tamil Nadu      | Institutional Review Board, Christian Medical College, Vellore (IRB Min. no. 9530 dated 22.07.2015)                     |
| 22 | Sawai Man Singh Medical college, Jaipur, Rajasthan              | Office of the Ethics Committee, Sawai Man Singh Medical college, Jaipur (3205/MC/EC/2017 dated 08.06.2017)              |
| 23 | Rabindranath Tagore Medical College, Udaipur, Rajasthan         | Ethics Committee, Rabindranath Tagore Medical College, Udaipur (RNT/STAT/IEC/2017/54 dated 18.04.2017)                  |
| 24 | Dr. Sampurnanand Medical College, Jodhpur, Rajasthan            | Institutional Ethics Committee, Dr. Sampurnanand Medical College, Jodhpur (No.F.1/Acad/MC/JU/17/16277 dated 20.06.2017) |
| 25 | Mahatma Gandhi Memorial Medical College, Indore, Madhya Pradesh | Institutional Ethics Committee, Mahatma Gandhi Memorial                                                                 |

|    |                                                                                  |                                                                                                                                          |
|----|----------------------------------------------------------------------------------|------------------------------------------------------------------------------------------------------------------------------------------|
|    |                                                                                  | Medical College, Indore (dated 24.05.2017)                                                                                               |
| 26 | Netaji Subhash Chandra Bose Medical College, Jabalpur, Madhya Pradesh            | Institutional Review Board, Netaji Subhash Chandra Bose Medical College, Jabalpur, Madhya Pradesh                                        |
| 27 | Baptist Christian Hospital, Tezpur, Assam                                        | Institutional Ethics Committee, Emmanuel Hospital Association, New Delhi (Protocol No. 163 dated 23.03.2018)                             |
| 28 | Government Medical college, Guwahati, Assam                                      | Institutional Review Board, Government Medical college, Guwahati (dated 28.02.2018)                                                      |
| 29 | King George Medical College, Lucknow, Uttar Pradesh                              | Institutional Ethics Committee, King George Medical University, Lucknow (No.515/Ethics/R-cell-17 dated 26.05.2017)                       |
| 30 | Institute of Medical Sciences, Banaras Hindu University, Varanasi, Uttar Pradesh | Institutional Ethics Committee, Institute of Medical Sciences, Banaras Hindu University, Varanasi (Dean/2016-17/EC/734 dated 31.03.2017) |
| 31 | Baba Ram Das Medical College, Gorakhpur, Uttar Pradesh                           | Institutional Review Board, Baba Ram Das Medical College, Gorakhpur, Uttar Pradesh (dated 20.07.2018)                                    |
| 32 | Mangala Hospital and Research Centre, Bijnor, Uttar Pradesh                      | Institutional Ethics Committee, Mangala Hospital and Research Centre, Bijnor (IEC/MH/2018/01 dated 24.01.2018)                           |
