# Supplementary material
Source: HighWire-hosted journal article supplement (https://bmjopen.bmj.com/content/9/4/e024840)
Supplement: inline-supplementary-material-3 [file inline-supplementary-material-3.pdf]

Supplementary table 3: Monitoring checklist for sites doing under five diarrhea surveillance

## SITE PROFILE

### 1. Staff

|                                                       |
|-------------------------------------------------------|
| Name of staff                                         |
| Position Title or Duties                              |
| Full-time or Part-time for rotavirus responsibilities |
| Percentage of time spent working on rotavirus         |
| Years of experience in Site                           |
| Undergone training at CMC or at site                  |

### 2. Staff and equipment

|                                           |
|-------------------------------------------|
| Designated place for project staff        |
| Storage of records (ICF/CRF etc.)         |
| Refrigerator for storage of stool samples |

### 3. Project management and supervision

|                                                                                                   |
|---------------------------------------------------------------------------------------------------|
| Lines of supervision and accountability clear to all staff                                        |
| Written protocols are available, and arrangements are in place for periodic review and evaluation |
| Arrangements are made for back-up staff to perform work during staff absences                     |

## PROJECT ACTIVITIES

### 1. Recording of recruitment

|                                                                                                                       |
|-----------------------------------------------------------------------------------------------------------------------|
| Number of children admitted for gastroenteritis                                                                       |
| Source from which the details in the hospital logbook like ward registers, online information, emergency records etc. |
| How many locations are children recruited from?                                                                       |

|                                                                                      |
|--------------------------------------------------------------------------------------|
| Number of children enrolled for the project so far (Informed consent form completed) |
| Reasons for non-enrolment                                                            |
| Number of children for whom case report form was filled                              |
| Reasons for non-completion of CRF                                                    |
| Number of children for whom stool sample was collected                               |
| Reasons for non-collection of stool sample                                           |
| Problems encountered by the site in completing this information                      |

## 2. Review of informed consent forms

|                                                                     |
|---------------------------------------------------------------------|
| Number of ICFs reviewed                                             |
| Location of filing the forms                                        |
| Legibility of the consent forms especially name, date and signature |
| Signatures of parents/guardians                                     |
| Signature of the investigator                                       |
| Problems encountered by the site in completing this information     |

## 3. Completion of Case Report Forms

|                                                                            |
|----------------------------------------------------------------------------|
| Number of CRFs reviewed                                                    |
| Number of CRFs with missing data fields                                    |
| Signature and a date for completion of CRF                                 |
| Record of stool sample collection                                          |
| Verification of stool sample collection against the hospital logbook       |
| Verification of stool sample collection against the sample transmittal log |

|                                                                 |
|-----------------------------------------------------------------|
| Problems encountered by the site in completing this information |
|-----------------------------------------------------------------|

#### 4. Collection of vaccination information

|                                                             |
|-------------------------------------------------------------|
| What are the sources of vaccination information in the CRFs |
|-------------------------------------------------------------|

|                                                   |
|---------------------------------------------------|
| Verification of dates on the CRFs from the source |
|---------------------------------------------------|

|                                                                 |
|-----------------------------------------------------------------|
| Problems encountered by the site in completing this information |
|-----------------------------------------------------------------|

#### 5. Collection of stool samples

|                             |
|-----------------------------|
| Collection of stool samples |
|-----------------------------|

|                             |
|-----------------------------|
| Number of samples collected |
|-----------------------------|

|                             |
|-----------------------------|
| Labelling of the containers |
|-----------------------------|

|                                                                                                         |
|---------------------------------------------------------------------------------------------------------|
| Storage of samples in the deep freezer including temperature maintenance and positioning of the samples |
|---------------------------------------------------------------------------------------------------------|

|                                   |
|-----------------------------------|
| Quantity of the collected samples |
|-----------------------------------|

|                                                            |
|------------------------------------------------------------|
| Verification of stool samples against the hospital logbook |
|------------------------------------------------------------|

|                                               |
|-----------------------------------------------|
| Verification of stool samples against the CRF |
|-----------------------------------------------|

|                                                                            |
|----------------------------------------------------------------------------|
| Verification of stool sample collection against the sample transmittal log |
|----------------------------------------------------------------------------|

|                                                                 |
|-----------------------------------------------------------------|
| Problems encountered by the site in completing this information |
|-----------------------------------------------------------------|

### SUMMARY INDICATORS

|                                                        |
|--------------------------------------------------------|
| Enrolment of >90% of admitted cases of gastroenteritis |
|--------------------------------------------------------|

|                                                              |
|--------------------------------------------------------------|
| Collection of adequate stools from >90% of enrolled children |
|--------------------------------------------------------------|

|                                                               |
|---------------------------------------------------------------|
| Complete documentation (ICF/CRF) in >90% of enrolled children |
|---------------------------------------------------------------|

|                                                                                              |
|----------------------------------------------------------------------------------------------|
| Collection of vaccination record (patient retained/government) for >75% of enrolled children |
|----------------------------------------------------------------------------------------------|
